# Supplementary material
Source: PubMed Central journal article supplement (PMC152984)
Supplement: pnas_0637221100_7.pdf [file pnas_0637221100_7.pdf]

Table 9. Crystal data and structure refinement for 4.

|                                   |                                                                  |          |
|-----------------------------------|------------------------------------------------------------------|----------|
| Identification code               | 4                                                                |          |
| Empirical formula                 | C <sub>29</sub> H <sub>43</sub> BCdN <sub>2</sub> S <sub>3</sub> |          |
| Formula weight                    | 639.04                                                           |          |
| Temperature                       | 173(2) K                                                         |          |
| Wavelength                        | 0.71073 Å                                                        |          |
| Crystal system                    | Orthorhombic                                                     |          |
| Space group                       | Pbca                                                             |          |
| Unit cell dimensions              | a = 15.5893(8) Å                                                 | a = 90°. |
|                                   | b = 18.0471(9) Å                                                 | b = 90°. |
|                                   | c = 22.2133(12) Å                                                | g = 90°. |
| Volume                            | 6249.5(6) Å <sup>3</sup>                                         |          |
| Z                                 | 8                                                                |          |
| Density (calculated)              | 1.358 Mg/m <sup>3</sup>                                          |          |
| Absorption coefficient            | 0.919 mm <sup>-1</sup>                                           |          |
| F(000)                            | 2656                                                             |          |
| Crystal size                      | 0.30 x 0.20 x 0.10 mm <sup>3</sup>                               |          |
| Theta range for data collection   | 1.83 to 28.34°.                                                  |          |
| Index ranges                      | -20<=h<=17, -23<=k<=24, -28<=l<=24                               |          |
| Reflections collected             | 29757                                                            |          |
| Independent reflections           | 7497 [R(int) = 0.0307]                                           |          |
| Completeness to theta = 28.34°    | 96.1 %                                                           |          |
| Absorption correction             | Empirical from SADABS                                            |          |
| Max. and min. transmission        | 0.9137 and 0.7700                                                |          |
| Refinement method                 | Full-matrix least-squares on F <sup>2</sup>                      |          |
| Data / restraints / parameters    | 7497 / 0 / 325                                                   |          |
| Goodness-of-fit on F <sup>2</sup> | 1.190                                                            |          |
| Final R indices [I>2sigma(I)]     | R1 = 0.0286, wR2 = 0.0690                                        |          |
| R indices (all data)              | R1 = 0.0396, wR2 = 0.0732                                        |          |
| Largest diff. peak and hole       | 0.470 and -0.597 e.Å <sup>-3</sup>                               |          |
