# Supplementary material
Source: PubMed Central journal article supplement (PMC152984)
Supplement: pnas_0637221100_11.pdf [file pnas_0637221100_11.pdf]

Table 13. Hydrogen coordinates ( $\times 10^4$ ) and isotropic displacement parameters ( $\text{\AA}^2 \times 10^3$ ) for **4**.

|        | x    | y     | z    | U(eq) |
|--------|------|-------|------|-------|
| H(1A)  | 7346 | 2393  | 3232 | 33    |
| H(1B)  | 8048 | 2301  | 2715 | 33    |
| H(2A)  | 7556 | 1039  | 1920 | 37    |
| H(2B)  | 6562 | 1007  | 1767 | 37    |
| H(4A)  | 4057 | 2275  | 3128 | 35    |
| H(5A)  | 5141 | 2453  | 2312 | 34    |
| H(7A)  | 9159 | 1208  | 4768 | 84    |
| H(7B)  | 9374 | 846   | 4128 | 84    |
| H(7C)  | 8494 | 647   | 4463 | 84    |
| H(8A)  | 9315 | 2518  | 4313 | 84    |
| H(8B)  | 8826 | 2685  | 3694 | 84    |
| H(8C)  | 9595 | 2099  | 3709 | 84    |
| H(9A)  | 7962 | 2201  | 4822 | 69    |
| H(9B)  | 7356 | 1561  | 4560 | 69    |
| H(9C)  | 7411 | 2345  | 4225 | 69    |
| H(11A) | 5306 | -1279 | 2440 | 91    |
| H(11B) | 5773 | -878  | 2993 | 91    |
| H(11C) | 6327 | -1327 | 2508 | 91    |
| H(12A) | 4627 | -89   | 2108 | 72    |
| H(12B) | 5214 | 632   | 2032 | 72    |
| H(12C) | 5048 | 294   | 2687 | 72    |
| H(13A) | 5563 | -754  | 1371 | 85    |
| H(13B) | 6566 | -843  | 1505 | 85    |
| H(13C) | 6188 | -55   | 1307 | 85    |
| H(15A) | 5420 | 1914  | 4697 | 45    |
| H(15B) | 5773 | 1098  | 4562 | 45    |
| H(15C) | 4985 | 1212  | 5014 | 45    |
| H(16A) | 3971 | 2286  | 4325 | 52    |
| H(16B) | 3580 | 1571  | 4651 | 52    |
| H(16C) | 3403 | 1708  | 3950 | 52    |

|        |      |       |      |    |
|--------|------|-------|------|----|
| H(17A) | 4899 | 217   | 3933 | 51 |
| H(17B) | 3975 | 468   | 3694 | 51 |
| H(17C) | 4121 | 315   | 4396 | 51 |
| H(18A) | 6819 | 3332  | 2540 | 46 |
| H(19A) | 6626 | 4283  | 1857 | 53 |
| H(20A) | 6478 | 4023  | 831  | 50 |
| H(21A) | 6520 | 2799  | 510  | 46 |
| H(22A) | 6678 | 1844  | 1197 | 37 |
| H(24A) | 7710 | -977  | 3464 | 44 |
| H(25A) | 9040 | -1563 | 3479 | 52 |
| H(26A) | 9763 | -1733 | 4381 | 56 |
| H(27A) | 9164 | -1310 | 5271 | 61 |
| H(28A) | 7840 | -707  | 5264 | 49 |

---
